# Supplementary material for: Impact of lifestyle intervention on dry eye disease in office workers: a randomized controlled trial
Source: PubMed Central journal article supplement — J Occup Health. 2018 Apr 4;60(4):281–8. doi: 10.1539/joh.2017-0191-OA (PMC6078845; doi:10.1539/joh.2017-0191-oa), 2018-04-04
Supplement: 1348-9585-60-281-s002.pdf [file 1348-9585-60-281-s002.pdf]

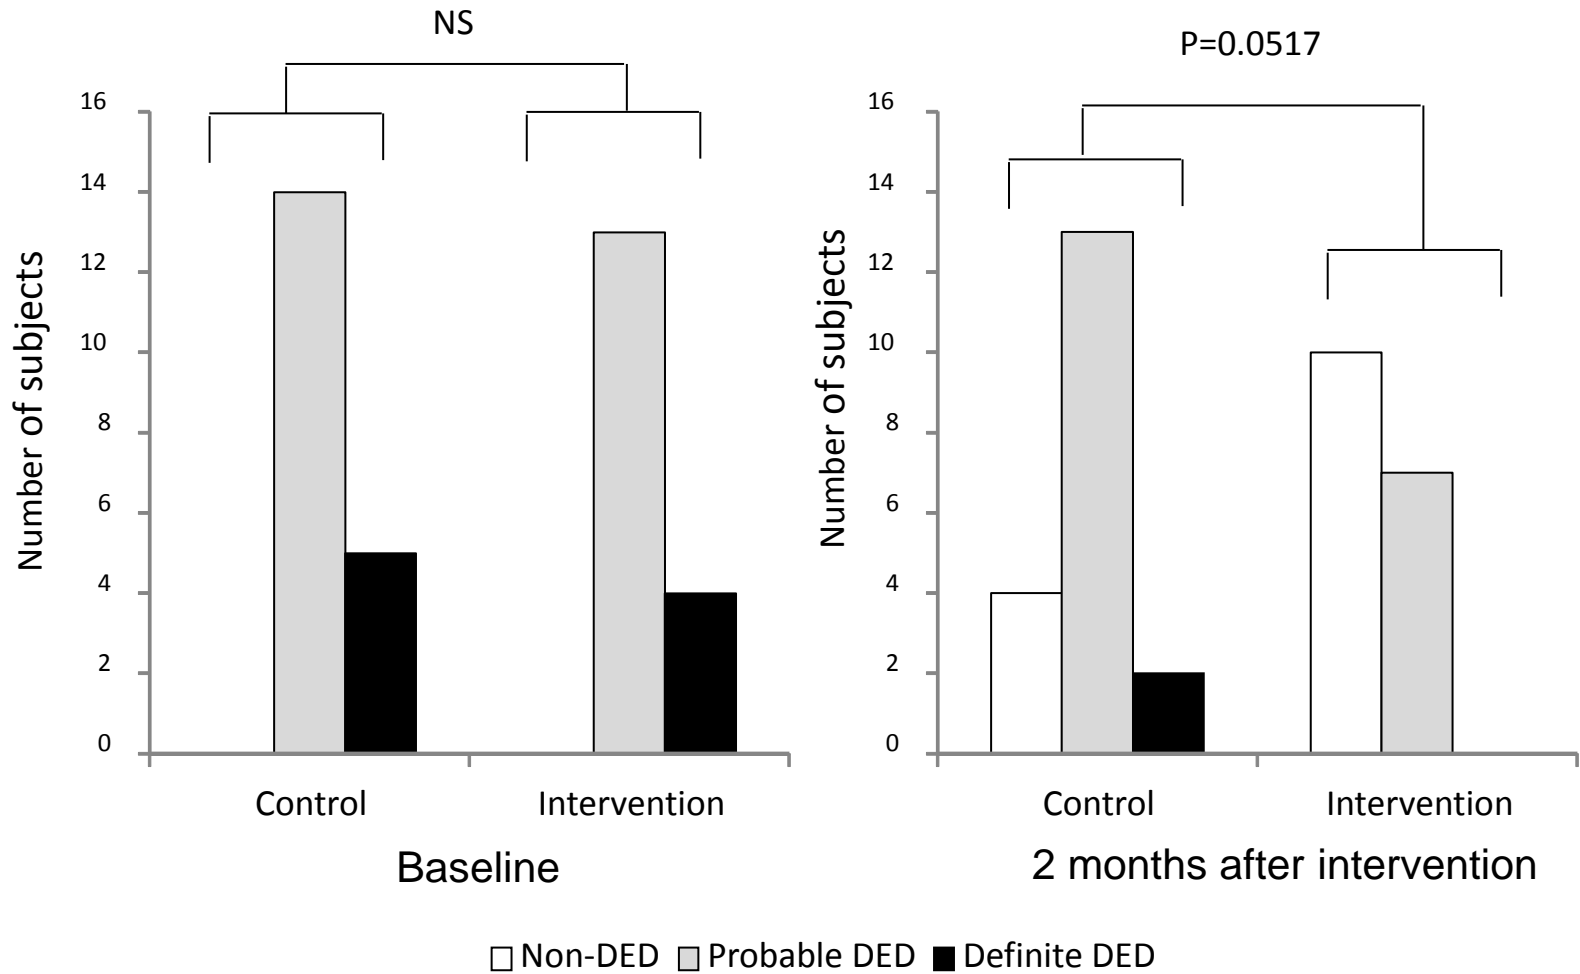

Supplemental Figure 2. Changes in dry eye disease diagnoses in office workers. Statistical significance was tested with the exact Wilcoxon two-sample test.
