# Supplementary figures and images for: Impact of lifestyle intervention on dry eye disease in office workers: a randomized controlled trial
Source: PubMed Central journal article supplement — J Occup Health. 2018 Apr 4;60(4):281–8. doi: 10.1539/joh.2017-0191-OA (PMC6078845; doi:10.1539/joh.2017-0191-oa), 2018-04-04

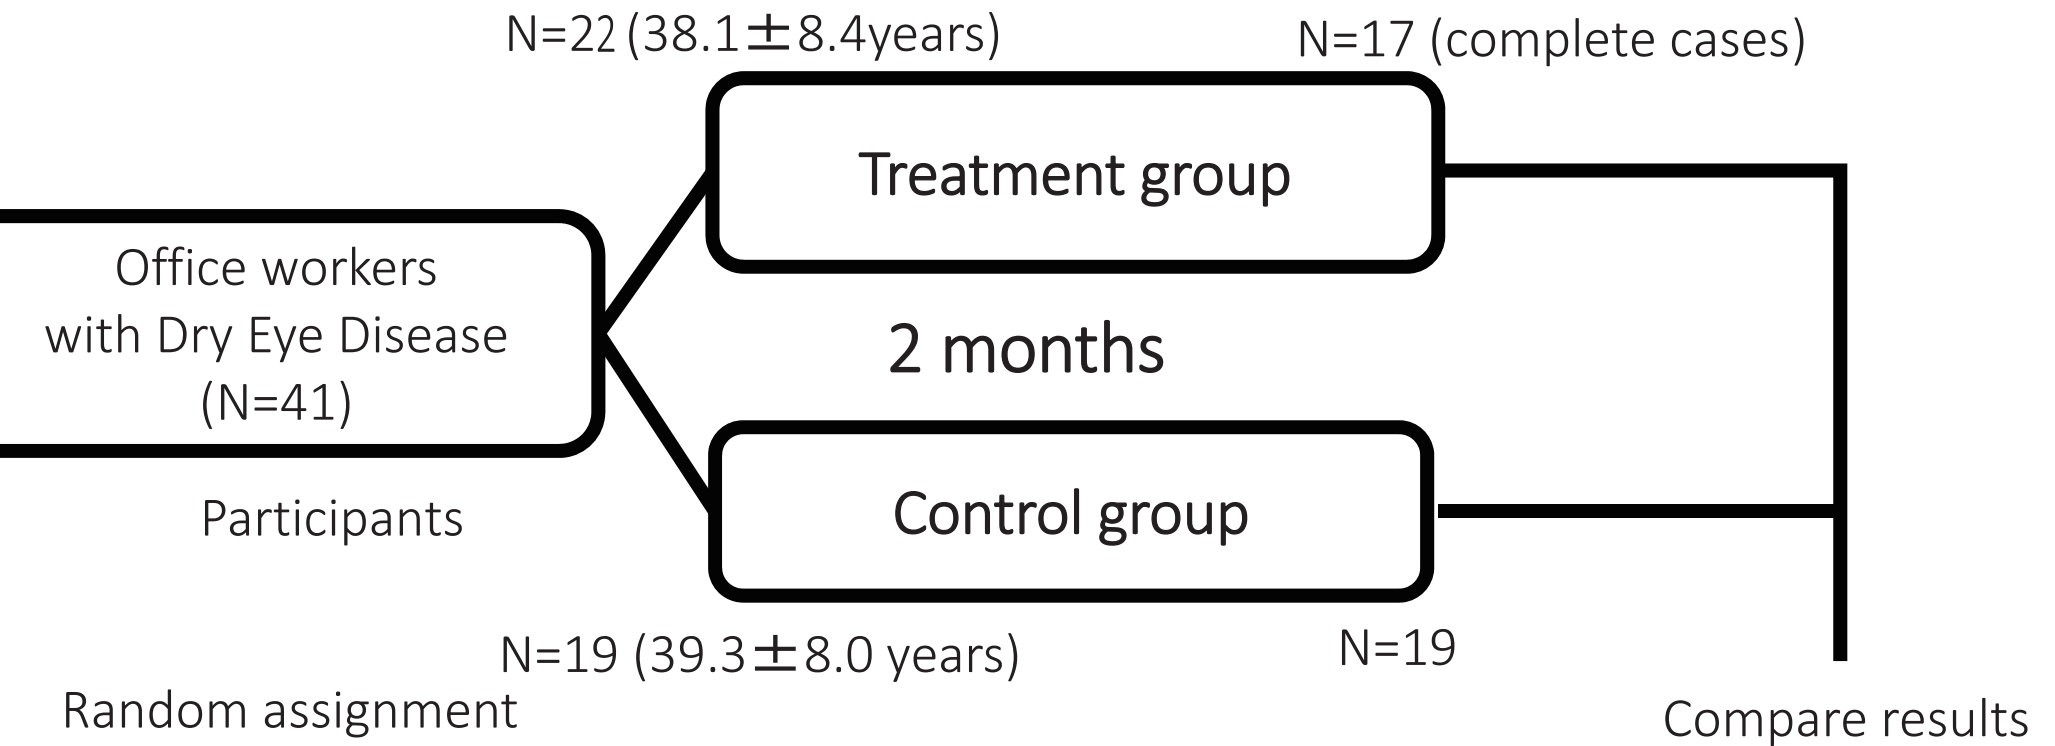

Supplemental Figure 1. Lifestyle interventions for office workers with dry eye disease.

Supplement: 1348-9585-60-281-s001.pdf [file 1348-9585-60-281-s001.pdf]
